# Supplementary material for: RETRACTED: Characterising the spatial and temporal brain metal profile in a mouse model of tauopathy
Source: Royal Society of Chemistry journal article supplement (doi:10.1039/c9mt00267g), 2019-12-24
Supplement: c9mt00267g1.pdf [file c9mt00267g1.pdf]

## Supplementary Figures

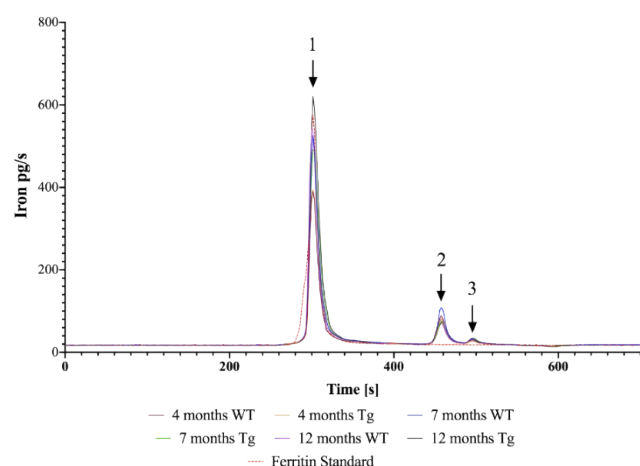

**Fig S1:** SEC-ICP-MS chromatogram of iron bound to metalloproteins rTg4510 and WT mice. The iron content within each peak was averaged for each group to generate the chromatogram. SEC-ICP-MS analysis revealed 3 peaks associated with iron-protein complexes. Tg=rTg4510; n=4-6/group.

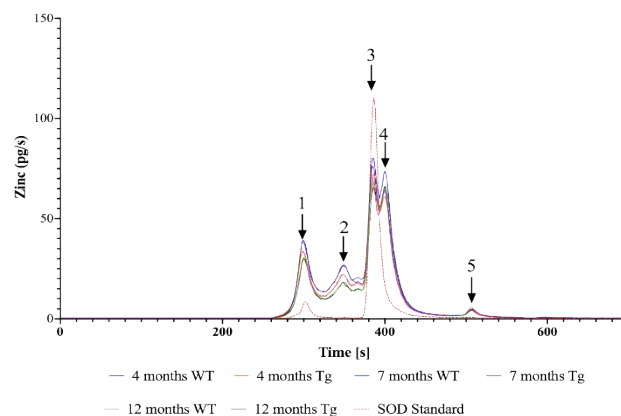

**Fig S3:** SEC-ICP-MS chromatogram of zinc bound to metalloproteins in whole tissue of rTg4510 and WT mice. The zinc content within each peak was averaged for each group to generate the chromatogram. SEC-ICP-MS trace revealed 5 peaks. Tg=rTg4510; n=4-6/group

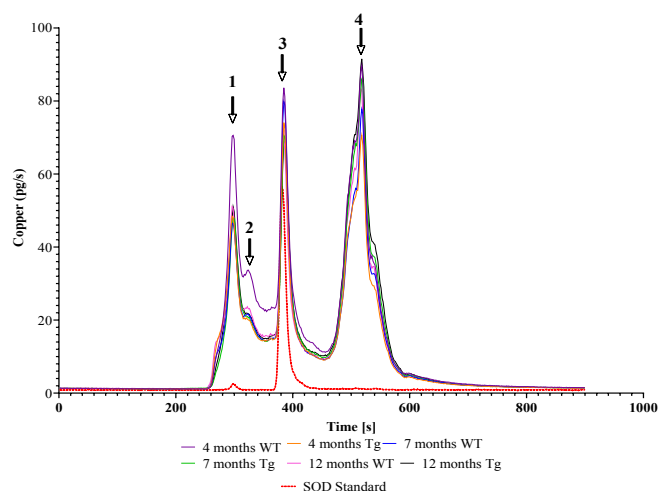

**Fig S2:** SEC-ICP-MS chromatogram of copper bound to metalloproteins in whole tissue of rTg4510 and WT mice. The copper content within each peak was averaged for each group to generate the chromatogram. SEC-ICP-MS trace revealed 4 peaks. Tg=rTg4510; n=4-6/group SEC-ICP-MS trace revealed 4 peaks. Tg=rTg4510; n=4-6/group
